# Supplementary material
Source: PubMed Central journal article supplement (PMC2906549)
Supplement: 1006542107_pnas.201006542SI.pdf [file 1006542107_pnas.201006542SI.pdf]

# Supporting Information

Yang et al. 10.1073/pnas.1006542107

## SI Materials and Methods

**Cohort Studied for Serological Levels of HMGB1: Characterization of Exposure.** The sera of asbestos-exposed individuals that we tested for HMGB1 (collected under an IRB-approved protocol to H.I.P.) were randomly chosen from a cohort of asbestos-exposed individuals that was described in detail in a previous publication (1). As stated in that publication, asbestos-exposed individuals have previously worked in an asbestos-related trade. Both exposure to asbestos and the duration of exposure were documented with the use of the American Thoracic Society Division of Lung Diseases adult questionnaire. More information regarding the exposure time and the occupation of these individuals has been previously published (1). As reported by Pass et al. (1), radiographic evidence of fibrosis was found in 33% and pleural plaques were found in 72% of the individuals in this cohort. None of these individuals had mesothelioma or other type of malignancy. The characteristics of the cohort of heavy smokers are shown in Table S1. (These individuals participated in an IRB-approved chemoprevention trial led by H.I.P.) Before treatment, all of these individuals had had bronchoscopies with bronchoscopic biopsies revealing mild to severe dysplasia. Serum was collected before treatment.

**RNA Preparation and Quantitative Real-Time PCR.** HM were exposed to crocidolite asbestos ( $5 \mu\text{g}/\text{cm}^2$ ) for 6, 12, and 24 h. Total RNA was isolated using RNeasy kit (Qiagen) and treated with RNase-

free DNase. Quantitative real-time PCR was performed as described elsewhere (2). The following primers were used: HMGB1, 5'-CCCCAAAAGCGTGAGCTTAAAAT-3' and 5'-AGTCTCGT-TCCCTGAGCAGTCC-3'; and 18S, 5'-TGATTAAGTCCCTG-CCCTTTGT-3' and 5'-TCAAGTTCGACCGTCTTCTCAG-3'. Relative HMGB1 mRNA expression levels for each sample were normalized to the internal control 18S rRNA. Relative PARP-1 mRNA expression levels for each sample were normalized to the housekeeping gene ACTB. PARP-1 and ACTB primers were purchased from Qiagen.

**Immunohistochemistry.** Immunohistochemistry was performed in both mouse and hamster tissues with rabbit polyclonal IgG purified anti-HMGB1 and anti-TNF- $\alpha$  antibodies (Abcam), both diluted 1:200 (Fig. 5 and Fig. S4). The inflammatory infiltrate around asbestos deposits was characterized in mice using the following antibodies: antimacrophage markers used: F4/80 (MCA497, Serotec), rat IgG2b (diluted 1:400), rabbit polyclonal pancytokeratin antibody (Santa Cruz) was used to stain mesothelial cells. Matching rat IgG isotype control and rabbit IgG isotype control were also used to rule out nonspecific staining (Fig. S4). CD4, CD8, and CD20 antibodies were also used to further identify the cells around asbestos deposits. Immunohistochemistry was independently performed by the investigators at the University of Hawaii and the University of Chicago, and the results were similar.

1. Pass HI, et al. (2005) Asbestos exposure, pleural mesothelioma, and serum osteopontin levels. *N Engl J Med* 353:1564–1573.

2. Yang H, et al. (2006) TNF-alpha inhibits asbestos-induced cytotoxicity via a NF-kappaB-dependent pathway, a possible mechanism for asbestos-induced oncogenesis. *Proc Natl Acad Sci USA* 103:10397–10402.



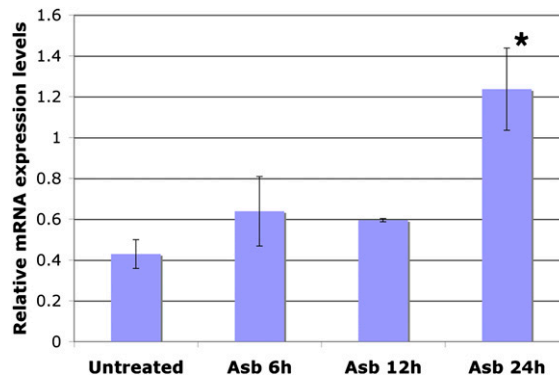

**Fig. S3.** Quantitative RT-PCR. Transcripts of HMGB1 are increased by asbestos exposure ( $5 \mu\text{g}/\text{cm}^2$ ). \*Significantly different compared with untreated HM ( $P < 0.05$ ).

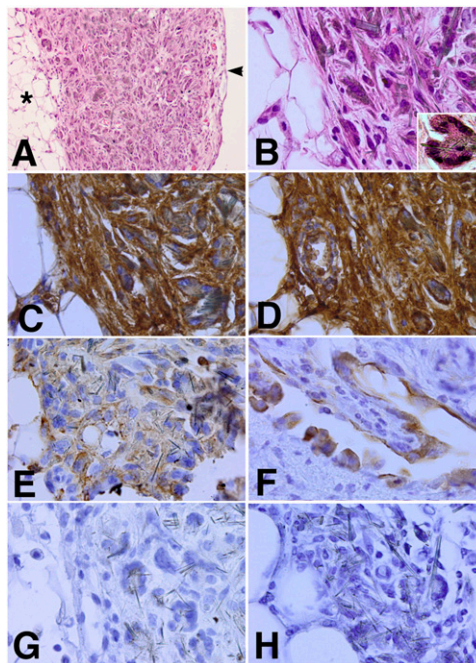

**Fig. S4.** Immunohistochemical analyses in murine specimens. (A) H&E staining shows a nodular area of chronic inflammation. (Original magnification: 100 $\times$ .) Asterisk indicates adipose tissue; arrow pointing indicates mesothelial cells. Space between single layer of mesothelial cells (peritoneum) and underneath adipose tissue is expanded by a nodule of inflammatory reaction in the areas of asbestos deposits containing mostly macrophages. (B) H&E staining. (Original magnification: 400 $\times$ .) Asbestos fibers are surrounded by cells with morphology consistent with macrophages. Several of these cells contained asbestos fibers or part of these fibers in their cytoplasm. Right corner: giant multinucleated cell containing asbestos fibers in cytoplasm. (Original magnification: 1,000 $\times$ .) (C) HMGB1 staining. (Original magnification: 400 $\times$ .) (D) TNF- $\alpha$  staining. (Original magnification: 400 $\times$ .) (E) Macrophage marker F4/80 staining. (Original magnification: 400 $\times$ .) (F) Cytokeratin staining. (Original magnification:  $\times$ 400.) Pan-cytokeratin stain highlighted the surface mesothelial cells lining the peritoneum. (G) Rat IgG isotype control staining. (Original magnification: 400 $\times$ .) (H) Rabbit IgG isotype control staining. (Original magnification: 400 $\times$ .)

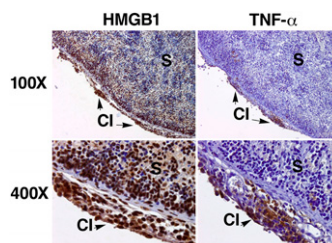

**Fig. S5.** Immunohistochemical analyses in hamster specimens. (Original magnification: top row, 100 $\times$ ; lower row, 400 $\times$ .) (Left) HMGB1 staining. (Right), TNF- $\alpha$  staining. CI, chronic inflammation; S, spleen.





**Table S1. Characteristics of smoker cohort tested for HMGB1 serum levels**

| Subject ID no. | Sex    | Age, y | Packs/y |
|----------------|--------|--------|---------|
| 1              | Male   | 73     | 45      |
| 2              | Male   | 57     | 90      |
| 3              | Male   | 73     | 45      |
| 4              | Male   | 53     | 35      |
| 5              | Male   | 69     | 100     |
| 6              | Male   | 50     | 30      |
| 7              | Male   | 68     | 50      |
| 8              | Male   | 74     | na      |
| 9              | Male   | 64     | 35      |
| 10             | Male   | 62     | 68      |
| 11             | Male   | 69     | 100     |
| 12             | Male   | 60     | 39      |
| 13             | Male   | 60     | 60      |
| 14             | Male   | 60     | 39      |
| 15             | Male   | 59     | 50      |
| 16             | Male   | 54     | 36      |
| 17             | Male   | 53     | 32      |
| 18             | Male   | 53     | 32      |
| 19             | Female | 64     | 40      |
| 20             | Male   | 53     | 35      |

Additional details are provided in Fig. 6. ID, identification.
